# Supplementary material for: Impact of Subclinical Borderline Inflammation on Kidney Transplant Outcomes
Source: PubMed Central journal article supplement — Transplant Direct. 2021 Jan 26;7(2):e663. doi: 10.1097/TXD.0000000000001119 (PMC7837932; doi:10.1097/txd.0000000000001119), 2021-01-26

## Supplemental Digital Content

**Table S1. Distribution of Banff severity scores at 6 months posttransplant.** Numbers reflect percentages of 6-month surveillance biopsies with scores of 0, 1, 2, or 3 for each Banff lesion according to SCI status. SCI, subclinical inflammation; NMA, no major surveillance abnormalities.

| Banff Injury Lesion (% with score of 0, 1, 2, 3) | All (n=441)       | SCI (n=137)        | NMA (n=304)      | P-value  |
|--------------------------------------------------|-------------------|--------------------|------------------|----------|
| tubulitis (t)                                    | 72%, 17%, 7%, 4%  | 10%, 56%, 23%, 11% | 100%, 0%, 0%, 0% | < 0.0001 |
| interstitial inflammation (i)                    | 89%, 8%, 2%, 1%   | 63%, 27%, 8%, 2%   | 100%, 0%, 0%, 0% | < 0.0001 |
| intimal arteritis (v)                            | 98%, 1%, 1%, 0%   | 95%, 4%, 1%, 0%    | 100%, 0%, 0%, 0% | < 0.0001 |
| total inflammation (ti)                          | 37%, 57%, 4%, 2%  | 6%, 79%, 10%, 5%   | 51%, 48%, 1%, 0% | < 0.0001 |
| inflammation in scarred areas (i+IFTA)           | 46%, 53%, 1%, 0%  | 37%, 60%, 3%, 0%   | 51%, 48%, 1%, 0% | 0.01     |
| glomerulitis (g)                                 | 92%, 6%, 2%, 0%   | 83%, 10%, 7%, 0%   | 96%, 4%, 0%, 0%  | < 0.0001 |
| peritubular capillaritis (ptc)                   | 95%, 3%, 2%, 0%   | 85%, 9%, 6%, 0%    | 99%, 1%, 0%, 0%  | < 0.0001 |
| interstitial fibrosis (ci)                       | 71%, 27%, 2%, 0%  | 59%, 34%, 6%, 1%   | 76%, 23%, 1%, 0% | 0.0002   |
| tubular atrophy (ct)                             | 32%, 65%, 3%, 0%  | 24%, 69%, 6%, 1%   | 36%, 63%, 1%, 0% | 0.001    |
| chronic vasculopathy (cv)                        | 61%, 27%, 10%, 2% | 53%, 29%, 16%, 2%  | 63%, 27%, 8%, 2% | 0.05     |
| transplant glomerulopathy (cg)                   | 97%, 3%, 0%, 0%   | 96%, 4%, 0%, 0%    | 97%, 3%, 0%, 0%  | 0.44     |
| mesangial matrix increase (mm)                   | 93%, 6%, 1%, 0%   | 90%, 8%, 1%, 1%    | 94%, 6%, 0%, 0%  | 0.30     |
| arteriolar hyalinosis (ah)                       | 81%, 14%, 4%, 1%  | 77%, 18%, 5%, 0%   | 83%, 12%, 4%, 1% | 0.21     |
| C4d staining of peritubular capillaries (C4d)    | 95%, 3%, 2%, 0%   | 93%, 4%, 2%, 1%    | 96%, 3%, 1%, 0%  | 0.48     |

**Table S2. Outcomes According to Treatment of Surveillance Phenotypes.** Comparison of outcomes after the 6-month surveillance biopsy according to whether surveillance findings were treated with increased immunosuppression or observed expectantly. The *P*-values represent comparisons between the treated and observed subgroups within each subclinical inflammation phenotype by Mann-Whitney-U test (continuous variables) or chi-square/Fisher's exact test (categorical variables). Continuous variables are presented as mean ± standard error. SCI, subclinical inflammation; SC-B-TCMR, subclinical borderline T cell-mediated rejection; SC-TCMR, subclinical T cell-mediated rejection; SC-MVI, subclinical microvascular injury.

| Outcome                                                | All SCI (n=137) |                 |                 |
|--------------------------------------------------------|-----------------|-----------------|-----------------|
|                                                        | Treated (n=60)  | Observed (n=77) | <i>P</i> -value |
| Triple Composite Endpoint (no, %)                      | 10 (17%)        | 7 (9%)          | 0.18            |
| Acute rejection after surveillance (no., %)            | 6 (10%)         | 5 (7%)          | 0.45            |
| TCMR (no. %)                                           | 1 (2%)          | 2 (3%)          | 0.61            |
| ABMR/Mixed(no., %)                                     | 5 (8%)          | 3 (4%)          |                 |
| Death-censored graft failure (no, %)                   | 5 (8%)          | 4 (5%)          | 0.39            |
| Death (no, %)                                          | 2 (3%)          | 0 (0%)          | 0.19            |
| Estimated GFR (mL/min/1.73 m <sup>2</sup> ), 12 months | 53 ± 2.5 (n=50) | 54 ± 2.2 (n=69) | 0.91            |
| Estimated GFR (mL/min/1.73 m <sup>2</sup> ), 24 months | 57 ± 2.8 (n=35) | 54 ± 3.5 (n=35) | 0.28            |
| Estimated GFR decline > 30%, 6-24 months               | 2/32 (6%)       | 2/39 (5%)       | 1.00            |

  

| Outcome                                                | SC-B-TCMR (n=102) |                 |                 | SC-TCMR (n=15) |                |                 | SC-MVI (n=20)   |                |                 |
|--------------------------------------------------------|-------------------|-----------------|-----------------|----------------|----------------|-----------------|-----------------|----------------|-----------------|
|                                                        | Treated (n=37)    | Observed (n=65) | <i>P</i> -value | Treated (n=10) | Observed (n=5) | <i>P</i> -value | Treated (n=13)  | Observed (n=7) | <i>P</i> -value |
| Triple Composite Endpoint (no, %)                      | 6 (16%)           | 7 (11%)         | 0.43            | 0 (0%)         | 0 (0%)         | N/A             | 4 (31%)         | 0 (0%)         | 0.25            |
| Acute rejection after surveillance (no., %)            | 3 (8%)            | 5 (8%)          | 1.00            | 0 (0%)         | 0 (0%)         | N/A             | 3 (23%)         | 0 (0%)         | 0.52            |
| TCMR (no. %)                                           | 1 (3%)            | 3 (5%)          | 0.82            | 0 (0%)         | 0 (0%)         | N/A             | 0 (0%)          | 0 (0%)         | 0.52            |
| ABMR/Mixed(no., %)                                     | 2 (5%)            | 3 (5%)          |                 |                |                |                 |                 |                |                 |
| Death-censored graft failure (no, %)                   | 3 (8%)            | 4 (6%)          | 0.70            | 0 (0%)         | 0 (0%)         | N/A             | 2 (15%)         | 0 (0%)         | 0.39            |
| Death (no, %)                                          | 2 (5%)            | 0 (0%)          | 0.13            | 0 (0%)         | 0 (0%)         | N/A             | 0 (0%)          | 0 (0%)         | N/A             |
| Estimated GFR (mL/min/1.73 m <sup>2</sup> ), 12 months | 54 ± 3.2 (n=32)   | 55 ± 2.4 (n=60) | 0.68            | 50 ± 4.9 (n=8) | 41 ± 3.3 (n=4) | 0.46            | 52 ± 6.8 (n=10) | 61 ± 9.2 (n=5) | 0.59            |
| Estimated GFR (mL/min/1.73 m <sup>2</sup> ), 24 months | 60 ± 3.3 (n=23)   | 55 ± 3.8 (n=39) | 0.19            | 53 ± 3.6 (n=6) | 36 ± 1.0 (n=2) | 0.07            | 52 ± 9.7 (n=6)  | 64 ± 5.6 (n=2) | 0.64            |
| Estimated GFR decline > 30%, 6-24 months               | 1/20 (5%)         | 2/34 (6%)       | 1.00            | 1/5 (20%)      | 0/2 (0%)       | 1.00            | 0/7 (0%)        | 0/3 (0%)       | N/A             |

**Figure S1. Time to Composite Endpoint According to Subclinical BKVAN Status at 6 Months Posttransplant.** Kaplan-Meier plot comparing time to the composite endpoint between the subclinical BK virus-associated nephropathy group (SC-BKVAN) group and the no major surveillance abnormalities group (NMA) using the log-rank test. Hatch marks represent censored cases in each group.

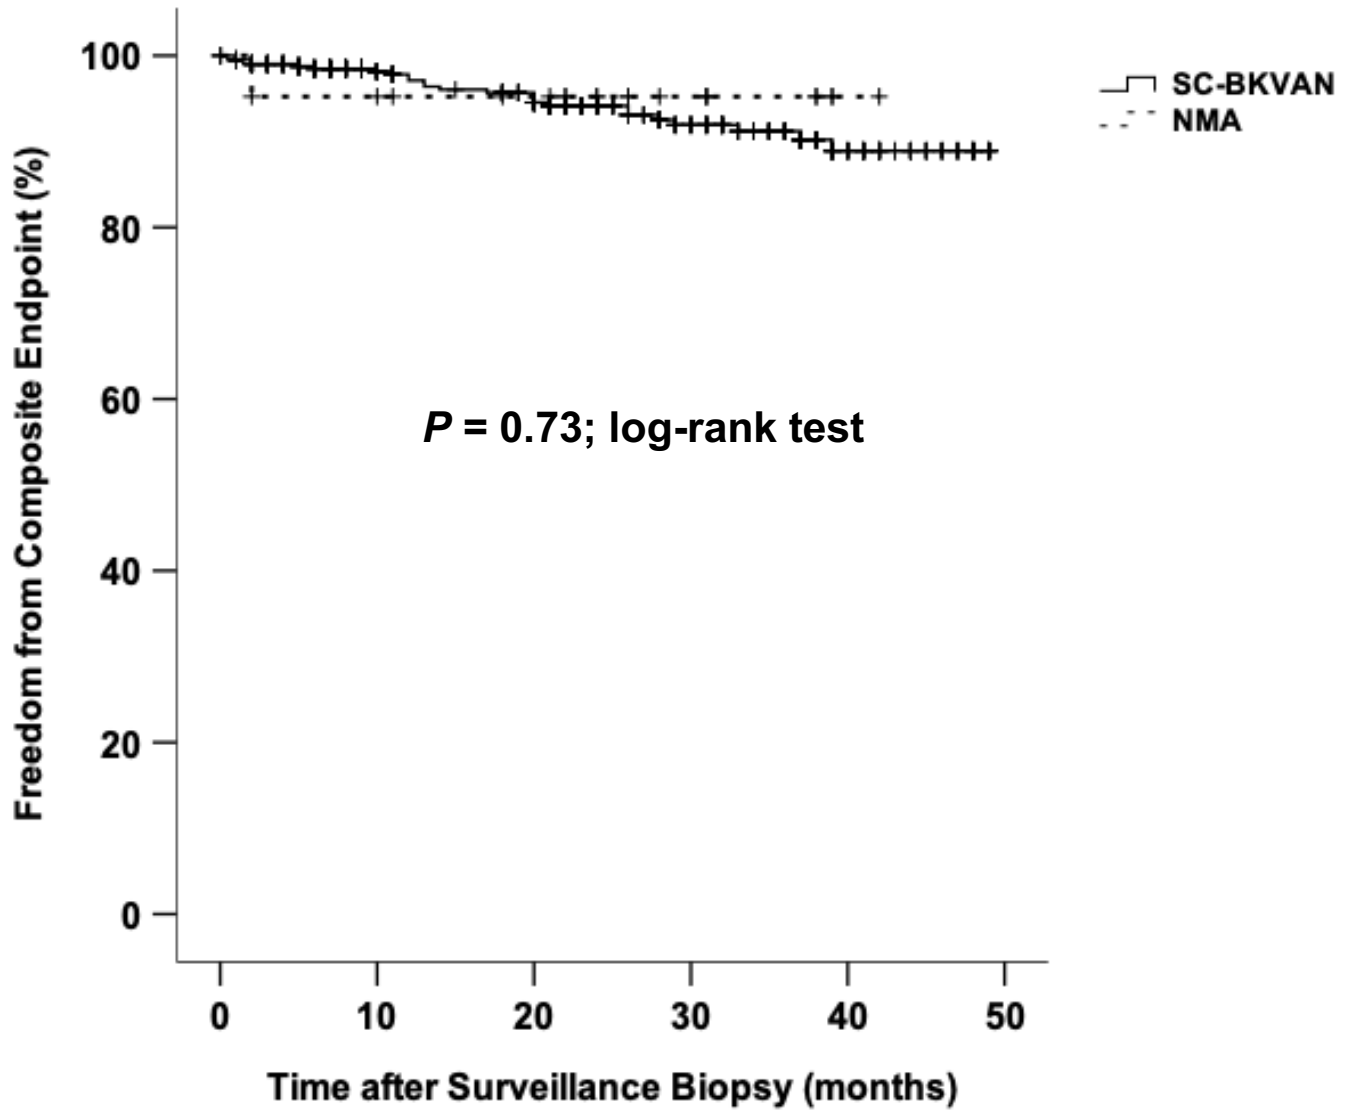

**Figure S2. Sensitivity Analysis of the Time to Composite Endpoint According to Presence of Subclinical Inflammation.** Kaplan-Meier plot comparing time to the composite endpoint between the subclinical inflammation group (SCI) and the no major surveillance abnormalities group (NMA) using the log-rank test, after excluding all subclinical BK virus-associated nephropathy (SC-BKVAN) cases in a sensitivity analysis. Hatch marks represent censored cases in each group.

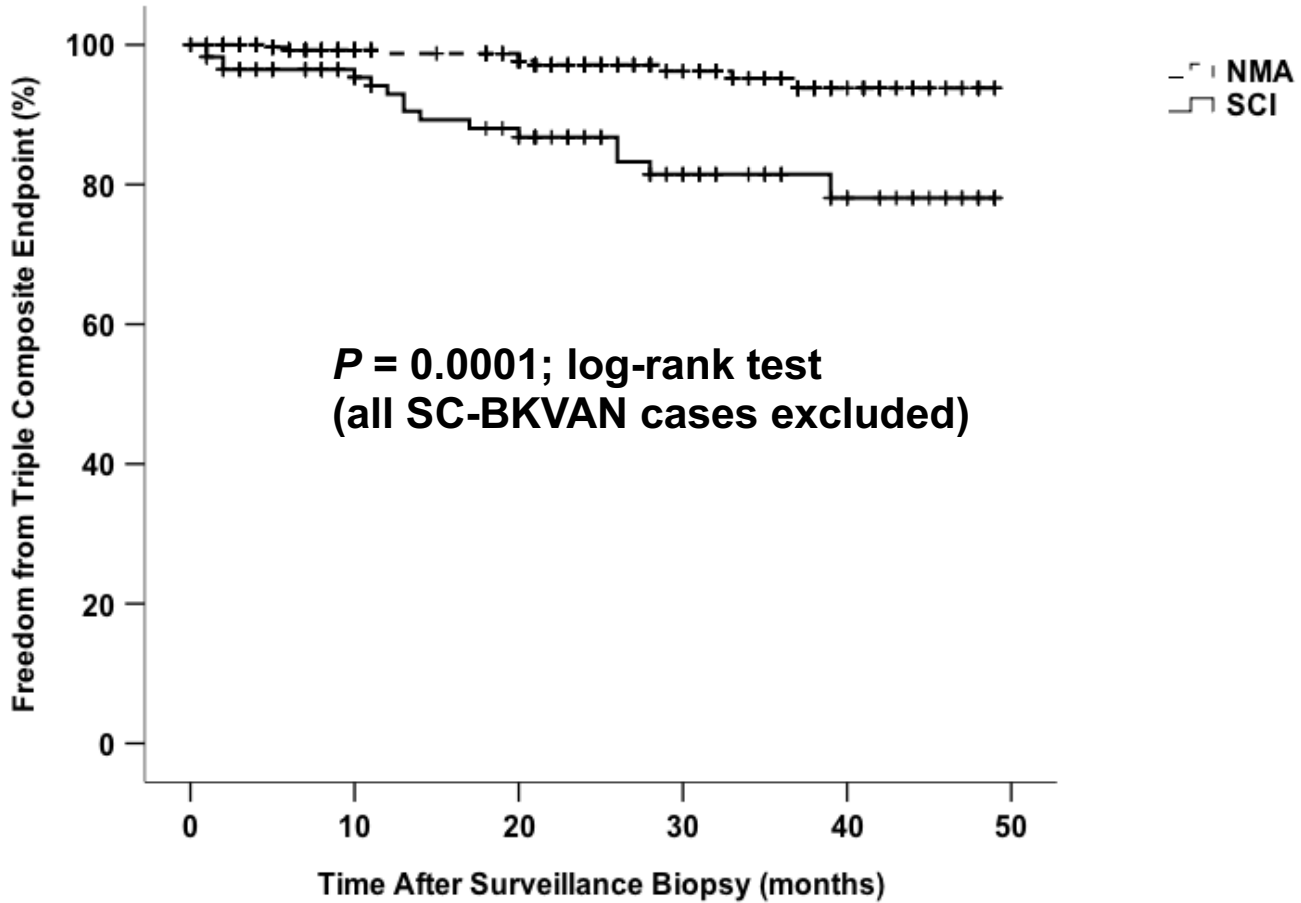

Supplement: txd-7-e663-s001.pdf [file txd-7-e663-s001.pdf]
